# Supplementary material
Source: ML conference proceedings conference paper supplement (https://openaccess.thecvf.com/content/CVPR2026/html/Wang_GR-Gauge_Cost-efficient_Training_CVPR_2026_paper.html)
Supplement: Supplementary file 1 [file Wang_GR-Gauge_Cost-efficient_Training_CVPR_2026_supplemental.pdf]

# Supplementary Material for GR-Gauge: Cost-efficient Training Configuration By Gauging the Gradient Redundancy

Guanjie Wang  
Zhiyuan College, Shanghai Jiao Tong University

Chen Chen  
Shanghai Jiao Tong University

## A. Assumptions for Theoretical Analysis

To model the metrics and establish the theoretical analysis, we make the following assumptions. Table 1 summarizes the key notations used in the analysis.

Table 1. Key notations used in the analysis.

|                   |                                                                                                                                                     |
|-------------------|-----------------------------------------------------------------------------------------------------------------------------------------------------|
| $g_x(\theta)$     | The gradient computed on a data point $x$ at the parameter $\theta$                                                                                 |
| $G_{est}(\theta)$ | The sampled batch gradient of the overall loss, i.e., $G_{est}(\theta) = \frac{1}{B} \sum_{i=1}^B g_{x_i}(\theta), x_i \sim \rho$                   |
| $G(\theta)$       | The gradient of the overall loss, i.e., $G(\theta) = \mathbb{E}_{x \sim \rho} [g_x(\theta)]$                                                        |
| $H$               | The constant Hessian matrix of the overall loss function                                                                                            |
| $\mu$             | The constant scale that quantifies the gradient noise variance, i.e., $\mu = \text{Tr}(\text{Cov}_{x \sim \rho} [g_x(\theta)]) / \ G(\theta)\ _2^2$ |
| $\beta$           | The constant smooth factor of the exponential moving average used to calculate $GR_T$ , which is fixed to 0.9 in the paper                          |
| $\eta$            | The learning rate                                                                                                                                   |
| $B$               | The global batch size                                                                                                                               |
| $\bar{\lambda}$   | The average eigenvalue of $H$                                                                                                                       |

**Assumption 1. (Gradient Distribution)** Assume that for any parameter  $\theta$ , the expectation and variance of stochastic gradient  $g_x(\theta)$  computed on a data point  $x$  satisfy that:

$$\mathbb{E}_{x \sim \rho} [g_x(\theta)] = G(\theta), \quad \text{Tr}(\text{Cov}_{x \sim \rho} (g_x(\theta))) = \mu(\theta) \|G(\theta)\|_2^2,$$

where  $\rho$  is the data distribution,  $\mu(\theta)$  is the scalar that reflects the scale of gradient noise variance introduced by the dataset.

**Assumption 2. (Local Smoothness and Stability)** Within a small neighborhood of  $\theta$  (short-term dynamics), we assume that the Hessian matrix  $H(\theta)$  of the overall loss function and gradient noise scale  $\mu(\theta)$  can be approximated as constants:

$$H(\theta) \approx H, \quad \mu(\theta) \approx \mu.$$

**Assumption 3. (Independent and Identically Distributed Gradients)** The stochastic gradients  $\{g_{x_i}(\theta)\}_{i=1}^N$  computed on different data samples  $\{x_i\}_{i=1}^N$  are independent and identically distributed (i.i.d.), satisfying:

$$g_{x_i}(\theta) \stackrel{i.i.d.}{\sim} \rho_\theta \quad \text{for all } i = 1, \dots, N,$$

where  $\rho_\theta$  is a distribution characterized by Assumption 1,  $N$  is the dataset size.

## B. Proof of Theorem 1

Before proving Theorem 1, we first prove Lemma 1.

**Lemma 1.** Under the Assumption 1, Assumption 2 and Assumption 3, denote the learning rate by  $\eta$  and the average eigenvalue of the Hessian matrix  $H$  of the loss function by  $\bar{\lambda}$ . Denote the global batch size by  $B$  and the gradient noise scale by  $\mu$ .  $\beta$  is the constant smooth factor defined in Definition 1. The theoretical expected stable value of  $GR_T$  is

$$\mathbb{E}[GR_T] \approx \frac{\left( (1 + \frac{\mu}{B})^2 (1 - \bar{\lambda}\eta - \beta)^2 \right) \left( \beta^{\frac{1}{1-\beta}} - \left( 1 - \frac{2\bar{\lambda}\eta}{1 + \frac{\mu}{B}} \right)^{\frac{1}{1-\beta}} \right)}{(1 - \beta) (2\bar{\lambda}\eta - (1 - \beta) (1 + \frac{\mu}{B})) \left( \beta^{\frac{1}{1-\beta}} - (1 - \bar{\lambda}\eta)^{\frac{1}{1-\beta}} \right)^2}. \quad (1)$$

*Proof.* For a given dataset with data points in the distribution  $x \sim D$ , each data point  $x$  at parameter  $\theta$  is associated with the gradient  $g_x(\theta)$ . Denote the global batch size as  $B$ . Then the sampled batch gradient  $G_{est}(\theta)$  at parameter  $\theta$  is

$$G_{est}(\theta) = \frac{1}{B} \sum_{i=1}^B g_{x_i}(\theta); \quad x_i \sim \rho. \quad (2)$$

During the training process, denote the learning rate as  $\eta$ , and the parameter at the  $t$ -th iteration be  $\theta_t$ . It can be considered that

$$\theta_{t+1} = \theta_t - \eta G_{est}(\theta_t). \quad (3)$$

Since the update can be regarded as a small quantity, we perform a Taylor expansion as

$$G_{est}(\theta_{t+1}) = \frac{1}{B} \sum_{i=1}^B g_{x_i}(\theta_t - \eta G_{est}(\theta_t)) \approx \frac{1}{B} \sum_{i=1}^B g_{x_i}(\theta_t) - \frac{\eta}{B} \sum_{i=1}^B H_{x_i}(\theta_t)^T G_{est}(\theta_t), \quad (4)$$

where  $H_{x_i}(\theta_t)$  denotes the Hessian matrix of the loss function on data point  $x_i$  at parameter  $\theta_t$ . Since the update is regarded as a small quantity and Assumption 2, the Hessian matrix of the different loss function and parameters can be regarded as constant, which is denoted as  $H$ . Then we take the expectation of Eq. 2 and Eq. 4 and obtain that

$$\mathbb{E}_{x \sim \rho}[G_{est}(\theta_t)] = G(\theta_t), \quad (5)$$

$$\mathbb{E}_{x \sim \rho}[G_{est}(\theta_{t+1})] = (I - \eta H^T) \mathbb{E}_{x \sim \rho}[G_{est}(\theta_t)]. \quad (6)$$

Adopting the idea of chunking, we set  $t = t_0$  as the new time zero point. Let the parameter at new iteration 0 be  $\theta_0$ . Therefore, at the new iteration  $t$ , we have

$$\mathbb{E}_{x \sim \rho}[G_{est}(\theta_t)] = (I - \eta H)^t G(\theta_0). \quad (7)$$

Then we calculate the theoretical expected value of  $\|\hat{m}_t\|_2^2$  which is defined in definition 1. By Eq. 7, it's obvious that

$$\begin{aligned} \mathbb{E}_{x \sim \rho}[\hat{m}_t] &\approx \beta^i \cdot \mathbb{E}_{x \sim \rho}[\hat{m}_0] + (1 - \beta) \sum_{k=0}^{t-1} \beta^{t-1-k} \cdot \mathbb{E}_{x \sim \rho}[G_{est}(\theta_k)] \\ &= \beta^i \cdot \mathbb{E}_{x \sim \rho}[\hat{m}_0] + (1 - \beta) \beta^{t-1} \left( \sum_{k=0}^{t-1} \left( \frac{I - \eta H}{\beta} \right)^k \right) G(\theta_0). \end{aligned} \quad (8)$$

Assume the eigenvalue decomposition of  $H$  is given by  $H = P \Lambda P^T$ , where  $P$  is the orthogonal matrix of eigenvectors and  $\Lambda = \text{diag}(\lambda_1, \dots, \lambda_n)$  is the diagonal matrix of eigenvalues. Denote the average eigenvalue of  $H$  as  $\bar{\lambda} = \frac{1}{n} \sum_{i=1}^n \lambda_i$ . Then by transformation and approximate, we know that (we leverage the formula  $P = P^T = P^{-1}$  when  $P$  is orthogonal matrix, and ignore  $\hat{m}_0$  since  $\beta^t$  can be regarded as a small value as  $t$  increasing)

$$\begin{aligned} \|\mathbb{E}_{x \sim \rho}[\hat{m}_t]\|_2^2 &\approx (1 - \beta)^2 \beta^{2t-2} G^T(\theta_0) P \left( \sum_{k=0}^{t-1} \left( \frac{I - \eta \Lambda}{\beta} \right)^k \right)^2 P^T G(\theta_0) \\ &\approx (1 - \beta)^2 \beta^{2t-2} \left( \sum_{k=0}^{t-1} \left( \frac{1 - \bar{\lambda} \eta}{\beta} \right)^k \right)^2 G^T(\theta_0) P P^T G(\theta_0) \\ &= \frac{(1 - \beta)^2 \beta^{2t}}{(1 - \bar{\lambda} \eta - \beta)^2} \left( \left( \frac{1 - \bar{\lambda} \eta}{\beta} \right)^t - 1 \right)^2 \|G(\theta_0)\|_2^2. \end{aligned} \quad (9)$$

Next, we analyze the variance. Since the batches selected between iteration  $t$  and  $t + 1$  are independent (which are denoted as

$x_i$  and  $x_j$ ), we can get that (ignoring higher-order terms)

$$\begin{aligned}
& G_{est}(\theta_{t+1})G_{est}^T(\theta_{t+1}) \\
& \approx \left( \frac{1}{B} \sum_{i=1}^B g_{x_i}(\theta_t) - \frac{\eta H^T}{B} \sum_{j=1}^B g_{x_j}(\theta_t) \right) \left( \frac{1}{B} \sum_{i=1}^B g_{x_i}(\theta_t) - \frac{\eta H^T}{B} \sum_{j=1}^B g_{x_j}(\theta_t) \right)^T \\
& \approx \frac{1}{B^2} \sum_{i=1}^B g_{x_i}(\theta_t) \sum_{i=1}^B g_{x_i}^T(\theta_t) - \frac{\eta H^T}{B^2} \sum_{j=1}^B g_{x_j}(\theta_t) \sum_{i=1}^B g_{x_i}^T(\theta_t) - \frac{\eta}{B^2} \sum_{i=1}^B g_{x_i}(\theta_t) \sum_{j=1}^B g_{x_j}^T(\theta_t) H. \tag{10}
\end{aligned}$$

Then by Assumption 3, we take the expectation

$$\begin{aligned}
& \mathbb{E}_{x \sim \rho} [G_{est}(\theta_{t+1})G_{est}^T(\theta_{t+1})] \\
& \approx \left( \frac{1}{B} \mathbb{E}_{x \sim \rho} [g_x(\theta)g_x^T(\theta)] + \frac{B-1}{B} G(\theta)G^T(\theta) \right) - \eta H^T G(\theta_t)G^T(\theta_t) - \eta G(\theta_t)G^T(\theta_t)H. \tag{11}
\end{aligned}$$

Since the covariance matrix is defined as  $Cov_{x \sim \rho}(g_x(\theta)) = \mathbb{E}_{x \sim \rho} [g_x(\theta)g_x^T(\theta)] - G(\theta)G^T(\theta)$ , we can obtain that

$$Tr(\mathbb{E}_{x \sim \rho} [G_{est}(\theta_{t+1})G_{est}^T(\theta_{t+1})]) \approx \frac{1}{B} Tr(Cov_{x \sim \rho}(g_x(\theta))) + Tr(G(\theta_t)G^T(\theta_t)) - 2\eta Tr(G(\theta_t)G^T(\theta_t)H). \tag{12}$$

Similarly, we decompose  $H = P\Lambda P^T$ , and obtain the results by transformation and approximate (we leverage the formulas  $Tr(AB) = Tr(BA)$  and  $Tr(PAP^T) = Tr(A)$ , where  $P$  is the orthogonal matrix)

$$Tr(G(\theta_t)G^T(\theta_t)H) = Tr(G(\theta_t)G^T(\theta_t)P\Lambda P^T) = Tr(\Lambda P^T(G(\theta_t)G^T(\theta_t))P) \approx \bar{\lambda} Tr(G(\theta_t)G^T(\theta_t)). \tag{13}$$

From Assumption 1 and Assumption 2 we know that  $Tr(Cov_{x \sim \rho}(g_x(\theta))) = \mu \|G(\theta_t)\|^2$ , where  $\mu$  is the constant gradient noise scale. Then based on Eq. 12, Eq. 13 and assumptions we have (we leverage the formulas  $Tr(xx^T) = \|x\|_2^2, x \in R^d$  and  $\mathbb{E}[Tr(A)] = Tr(\mathbb{E}[A])$ )

$$\mathbb{E}_{x \sim \rho} [\|G_{est}(\theta_{t+1})\|_2^2] \approx \left( 1 - 2\bar{\lambda}\eta + \frac{\mu}{B} \right) \|G(\theta_t)\|_2^2. \tag{14}$$

Since Eq. 14 holds for any  $\bar{\lambda}\eta$ , we let  $\bar{\lambda}\eta \rightarrow 0$  and have  $\theta_{t+1} \rightarrow \theta_t$ . Then we obtain that

$$\mathbb{E}_{x \sim \rho} [\|G_{est}(\theta_t)\|_2^2] \approx \left( 1 + \frac{\mu}{B} \right) \|G(\theta_t)\|_2^2. \tag{15}$$

Similarly, we have

$$\mathbb{E}_{x \sim \rho} [\|G_{est}(\theta_t)\|_2^2] = \left( 1 + \frac{\mu}{B} \right) \left( 1 - \frac{2\bar{\lambda}\eta}{1 + \frac{\mu}{B}} \right)^t \|G(\theta_0)\|_2^2. \tag{16}$$

Also we calculate the theoretical expected value of  $\|\hat{v}_t\|_1$  which is defined in definition 1. By Eq. 16, we can similarly get the result that (also ignore  $\hat{v}_0$  due to the same reason)

$$\begin{aligned}
\mathbb{E}_{x \sim \rho} [\|\hat{v}_t\|_1] & \approx \beta^i \cdot \mathbb{E}_{x \sim \rho} [\|\hat{v}_0\|_1] + (1 - \beta) \sum_{k=0}^{t-1} \beta^{t-1-k} \mathbb{E}_{x \sim \rho} [\|G_{est}(\theta_k)\|_2^2] \\
& \approx \left( 1 + \frac{\mu}{B} \right) (1 - \beta) \beta^{t-1} \left( \sum_{k=0}^{t-1} \left( \frac{1 - \frac{2\bar{\lambda}\eta}{1 + \frac{\mu}{B}}}{\beta} \right)^k \right) \|G(\theta_0)\|_2^2 \\
& = \frac{\left( 1 + \frac{\mu}{B} \right)^2 (1 - \beta) \beta^t}{(1 - \beta) \left( 1 + \frac{\mu}{B} \right) - 2\bar{\lambda}\eta} \left( \left( \frac{1 - \frac{2\bar{\lambda}\eta}{1 + \frac{\mu}{B}}}{\beta} \right)^t - 1 \right) \|G(\theta_0)\|_2^2. \tag{17}
\end{aligned}$$

Based on Eq. 9 and Eq. 17, we can get the theoretical expected value of  $GR_T(t)$ :

$$\mathbb{E}_{x \sim \rho}[GR_T(t)] \approx \frac{\mathbb{E}_{x \sim \rho}[|\hat{v}_t|_1]}{\mathbb{E}_{x \sim \rho}[|\hat{m}_t|_2^2]} \approx \frac{(1 + \frac{\mu}{B})^2(1 - \bar{\lambda}\eta - \beta)^2}{(1 - \beta)(2\bar{\lambda}\eta - (1 - \beta)(1 + \frac{\mu}{B}))} \cdot \frac{\beta^t - \left(1 - \frac{2\bar{\lambda}\eta}{1 + \frac{\mu}{B}}\right)^t}{\left(\beta^t - (1 - \bar{\lambda}\eta)^t\right)^2}. \quad (18)$$

For  $t$ , because EMA processing is used,  $t = \frac{1}{1-\beta}$  is used as the estimated time for the expected stable value of  $GR_T$ . Thus we obtain that

$$\mathbb{E}_{x \sim \rho}[GR_T] \approx \frac{(1 + \frac{\mu}{B})^2(1 - \bar{\lambda}\eta - \beta)^2}{(1 - \beta)(2\bar{\lambda}\eta - (1 - \beta)(1 + \frac{\mu}{B}))} \cdot \frac{\beta^{\frac{1}{1-\beta}} - \left(1 - \frac{2\bar{\lambda}\eta}{1 + \frac{\mu}{B}}\right)^{\frac{1}{1-\beta}}}{\left(\beta^{\frac{1}{1-\beta}} - (1 - \bar{\lambda}\eta)^{\frac{1}{1-\beta}}\right)^2}. \quad (19)$$

Here, we complete the proof of Lemma 1. □

Then we proceed to prove Theorem 1.

**Theorem 1.** *There exists a positive partial derivative relationship between the learning rate  $\eta$  and the temporal gradient redundancy  $GR_T$ :*

$$\frac{\partial}{\partial \eta} \mathbb{E}[GR_T] > 0. \quad (20)$$

*Proof.* Based on Lemma 1, we perform a Taylor expansion of  $GR_T$  with respect to  $\bar{\lambda}\eta$  and approximating to the first order

$$\mathbb{E}_{x \sim \rho}[GR_T] \approx \frac{1 + \frac{\mu}{B}}{1 - \beta^t} + \frac{2\frac{\mu}{B}}{1 - \beta^t} \left( \frac{1}{1 - \beta^{\frac{1}{1-\beta}}} - \frac{1}{1 - \beta} \right) \bar{\lambda}\eta. \quad (21)$$

Therefore we have

$$\frac{\partial}{\partial \bar{\lambda}\eta} \mathbb{E}_{x \sim \rho}[GR_T] \approx \frac{2\frac{\mu}{B}\bar{\lambda}}{1 - \beta^t} \left( \frac{1}{1 - \beta^{\frac{1}{1-\beta}}} - \frac{1}{1 - \beta} \right). \quad (22)$$

Since  $0 < \beta < 1$ , for  $t \in \mathbb{N}_+$ , the following inequality holds

$$\frac{i}{1 - \beta^t} - \frac{1}{1 - \beta} = \frac{t - (1 + \beta + \dots + \beta^{t-1})}{(1 - \beta)(1 + \beta + \dots + \beta^{t-1})} > 0. \quad (23)$$

Through monotonicity, we know the the inequality holds when  $i = \frac{1}{1-\beta}$ . Now we obtain that

$$\frac{\partial}{\partial \eta} \mathbb{E}_{x \sim \rho}[GR_T] > 0. \quad (24)$$

Here, we complete the proof of Theorem 1. □

### C. Proof of Theorem 2

Before proving Theorem 2, we first prove Lemma 2.

**Lemma 2.** *Under the Assumption 1, Assumption 2 and Assumption 3, denote the global batch size by  $B$  and the gradient noise scale by  $\mu$ . The theoretical expected stable value of  $GR_S$  is*

$$\mathbb{E}[GR_S] \approx \frac{1 + \mu}{B + \mu}. \quad (25)$$

*Proof.* By Assumption 1 and Assumption 2, we have (we leverage the formula  $\mathbb{E}[\|x^2\|_1] = \text{Tr}(\text{Cov}_{x \sim \rho}(x))$  for  $x \in R^d$ ):

$$\mathbb{E}_{x \sim \rho} \left[ \left\| \sum_{i=1}^B g_{x_i}^2(\theta_t) \right\|_1 \right] = B \cdot \text{Tr}(\text{Cov}_{x \sim \rho}(g_{x_i}(\theta_t))) + B \|G(\theta_t)\|_2^2 = B(\mu + 1) \|G(\theta_t)\|_2^2. \quad (26)$$

Based on Assumption 3, we know that  $g_{x_i}(\theta_t)$  and  $g_{x_j}(\theta_t)$  are independent and identically distributed for  $i \neq j$ , i.e.,  $\mathbb{E}_{x \sim \rho}[g_{x_i}^T(\theta_t)g_{x_j}(\theta_t)] = (\mathbb{E}_{x \sim \rho}[g_x(\theta_t)])^T (\mathbb{E}_{x \sim \rho}[g_x(\theta_t)])$ ,  $\forall i \neq j$ . Therefore we can obtain that

$$\mathbb{E}_{x \sim \rho} \left[ \left\| \sum_{i=1}^B g_{x_i}(\theta_t) \right\|_2^2 \right] = \mathbb{E}_{x \sim \rho} \left[ \left\| \sum_{i=1}^B g_{x_i}^2(\theta_t) \right\|_1 \right] + \mathbb{E}_{x \sim \rho} \left[ \sum_{1 \leq i, j \leq B, i \neq j} g_{x_i}^T(\theta_t)g_{x_j}(\theta_t) \right] = (B\mu + B^2) \|G(\theta_t)\|_2^2. \quad (27)$$

By definition 2, we have

$$\mathbb{E}_x[GR_S] \approx \frac{\mathbb{E}_{x \sim \rho} \left[ \left\| \sum_{i=1}^B g_{x_i}^2(\theta_t) \right\|_1 \right]}{\mathbb{E}_{x \sim \rho} \left[ \left\| \sum_{i=1}^B g_{x_i}(\theta_t) \right\|_2^2 \right]} = \frac{1 + \mu}{B + \mu}. \quad (28)$$

□

We next proceed to prove Theorem 2.

**Theorem 2.** *There exists a negative partial derivative relationship between the batch size  $B$  and the spatial gradient redundancy  $GR_S$ :*

$$\frac{\partial}{\partial B} \mathbb{E}[GR_S] < 0. \quad (29)$$

*Proof.* By Lemma 2, it's obvious that

$$\frac{\partial}{\partial B} \mathbb{E}[GR_S] = -\frac{1 + \mu}{(B + \mu)^2} < 0. \quad (30)$$

□

## D. The methods for practical $GR_S$ measurements

Notice that it is impractical to compute the gradient for each sample individually. In data parallelism, we assume there are  $n$  devices, so the local batch size is set to  $B/n$ . Let the gradient aggregated within each device  $i$  be denoted as  $\tilde{G}_{est,i}(\theta_t)$ . Similar to  $GR_S$ , we define

$$\xi_k = \frac{\left\| \sum_{i=1}^k \tilde{G}_{est,i}^2(\theta_t) \right\|_1}{\left\| \sum_{i=1}^k \tilde{G}_{est,i}(\theta_t) \right\|_2^2} \quad (31)$$

for  $k = 1, 2, \dots, n$ . Note that in data-parallel distributed training, we perform an all-reduce operation every iteration. This process involves collecting the gradients from all local batches and then reducing them. Through this process that we can easily compute  $\sum_{i=1}^k \tilde{G}_{est,i}^2(\theta_t)$  and  $\sum_{i=1}^k \tilde{G}_{est,i}(\theta_t)$  between devices when reducing the gradient, thus the calculation of  $\xi_k$  is feasible. According to Assumption 1 and Assumption 3, we can similarly obtain that

$$\text{Tr}(\text{Cov}_{x \sim \rho}(\tilde{G}_{est}(\theta))) = \frac{\text{Tr}(\text{Cov}_{x \sim \rho}(g_x(\theta)))}{B/n} = \frac{n}{B} \mu \|G(\theta)\|_2^2. \quad (32)$$

Similarly to Appendix C, we can easily obtain that

$$\mathbb{E}_{x \sim \rho} [\xi_k] \approx \frac{1 + \frac{n\mu}{B}}{k + \frac{n\mu}{B}}. \quad (33)$$

Therefore, by transformation, we have

$$\frac{k-1}{1-\xi_k} - k = \frac{n}{B} \mu. \quad (34)$$

By performing linear fitting between  $\left(\frac{k-1}{1-\xi_k} - k\right)$  and  $\frac{n}{B}$  (for  $k = 1, 2, \dots, n$ ), the slope  $\mu$  can be obtained when  $n \geq 2$ , from which  $\mathbb{E}_x[GR_S]$  can be further derived from Lemma 2 which has been solidly validated. In the special case when  $n = 1$  (only a single worker), we set the gradient accumulation steps to at least two, through which equivalent estimates across multiple devices can be obtained.

## E. Theoretical estimate of the ideal value for $GR_T$ and $GR_S$

We first estimate the theoretical ideal value for  $GR_S$ . Previous works [1] suggests that unlimitedly increasing the batch size does not yield proportional performance scaling. There exists a ‘turning point’ beyond which further batch size enlargement leads to rapidly diminishing scaling returns. The turning point is given as

$$\mathcal{B} = \frac{Tr(H \cdot Cov(\nabla L_i))}{g^T H g} \approx \frac{\mu \bar{\lambda} \|g\|_2^2}{\bar{\lambda} \|g\|_2^2} = \mu. \quad (35)$$

This suggests that batch size shouldn’t exceed  $\mu$  to avoid helpless and inefficient scale up. According to Lemma 2, we get the corresponding  $GR_S$  value with  $B = \mathcal{B}$  is

$$\mathbb{E}_{x \sim \rho}[GR_S]_{B=\mathcal{B}} \approx \frac{1 + \mu}{B + \mu} \approx 0.5. \quad (36)$$

Since  $\frac{\partial}{\partial B} \mathbb{E}_{x \sim \rho}[GR_S] < 0$ , this suggests that the ideal  $\mathbb{E}_{x \sim \rho}[GR_S] \geq 0.5$ .

On the other hand, to achieve efficient training, the batch size should not be too small. A typical lower-bound estimate is half of the turning point batch size (i.e.,  $\mathcal{B}/2$ ). Under this configuration, when applied to Lemma 2, we obtain  $\mathbb{E}_{x \sim \rho}[GR_S] = \frac{1+\mu}{\mathcal{B}/2+\mu} \approx 0.65$ . In summary, we theoretically estimate the  $GR_S$  range to be  $[0.5, 0.65]$ , which has been empirically validated by our preceding experiments.

Then we estimate the theoretical ideal value for  $GR_T$ . We take  $B = \mu$  as the typical value. According to the gradient noise scale model [1], it gives the best learning rate with best efficiency by

$$\eta_{opt} = \frac{\|g\|_2^2}{g^T H g} \frac{1}{1 + \frac{\mathcal{B}}{B}} \approx \frac{1}{2\bar{\lambda}}. \quad (37)$$

From Lemma 1, we obtain that

$$\mathbb{E}_{x \sim \rho}[GR_T]_{B=\mu, \beta=0.9, \eta=\frac{1}{2\bar{\lambda}}} = \left[ \frac{(1 + \frac{\mu}{B})^2 (1 - \bar{\lambda}\eta - \beta)^2}{(1 - \beta) (2\bar{\lambda}\eta - (1 - \beta) (1 + \frac{\mu}{B}))} \cdot \frac{\beta^{\frac{1}{1-\beta}} - \left(1 - \frac{2\bar{\lambda}\eta}{1 + \frac{\mu}{B}}\right)^{\frac{1}{1-\beta}}}{\left(\beta^{\frac{1}{1-\beta}} - (1 - \bar{\lambda}\eta)^{\frac{1}{1-\beta}}\right)^2} \right]_{B=\mu, \beta=0.9, \eta=\frac{1}{2\bar{\lambda}}} \approx 20.$$

That suggests the ideal value of  $GR_T$  will be around 20.

## References

- [1] Sam McCandlish, Jared Kaplan, Dario Amodei, and OpenAI Dota Team. An empirical model of large-batch training, 2018. 6
